# Supplementary material for: Thioether-tethered bisquinoline derivatives as fluorescent probes for mercury(ii) and iron(iii) ions
Source: Royal Society of Chemistry journal article supplement (doi:10.1039/c3nj00233k), 2013-01-01
Supplement: c3nj00233k.pdf [file c3nj00233k.pdf]

Supplementary Information for  
**Thioether-tethered bisquinoline derivatives as fluorescent probes for mercury(II)  
and iron(III) ions**

Yuji Mikata,<sup>a,\*</sup> Fumie Nakagaki<sup>b</sup> and Kaori Nakanishi<sup>b</sup>

<sup>a</sup>*KYOUSEI Science Center and* <sup>b</sup>*Department of Chemistry, Faculty of Science, Nara  
Women's University, Nara 630-8506, Japan*

## Experimental

### General

All reagents and solvents used for synthesis were from commercial sources and used as received. Acetonitrile (Dojin) was spectral grade (Spectrosol). <sup>1</sup>H NMR (400 MHz) and <sup>13</sup>C NMR (100 MHz) spectra were recorded on a JEOL JNM AL-400 spectrometer and referenced to internal Si(CH<sub>3</sub>)<sub>4</sub> or solvent signals. UV-vis and fluorescence spectra were measured on a Jasco V-660 spectrophotometer and Jasco FP-6300 spectrofluorometer, respectively. *CAUTION: Perchlorate salts of metal complexes with organic ligands are potentially explosive. All due precautions should be taken.*

### BQET<sup>1</sup>

To the acetonitrile suspension (30 mL) of 2-chloromethylquinoline hydrochloride

(535 mg, 2.50 mmol) and 1,2-ethanedithiol (100  $\mu$ L, 1.25 mmol) was added potassium carbonate (1.38 g, 10.0 mmol) and stirred for 2 days under reflux. After removal of the solvent, the residue was extracted with chloroform/water. The organic layer was dried, evaporated, and washed with acetonitrile to give BQET as white powder. Yield, 445 mg (1.18 mmol, 94%).

$^1\text{H}$  NMR ( $\text{CDCl}_3$ ):  $\delta$  8.08 (d, 2H,  $J = 8.3$  Hz), 8.00 (d, 2H,  $J = 8.3$  Hz), 7.77 (m, 2H), 7.67 (m, 2H), 7.51 (m, 4H), 3.98 (s, 4H), 2.71 (s, 4H).

$^{13}\text{C}$  NMR ( $\text{CDCl}_3$ ):  $\delta$  158.5, 147.1, 136.6, 129.3, 128.8, 127.2, 126.7, 126.1, 120.1, 38.5, 31.1.

### **6-MeOBQET**

To the acetonitrile suspension (50 mL) of 6-methoxy-2-chloromethylquinoline (1.14 g, 5.51 mmol) and 1,2-ethanedithiol (226  $\mu$ L, 2.75 mmol) was added potassium carbonate (3.46 g, 25.0 mmol) and stirred for 2 days under reflux. After removal of the solvent, the residue was extracted with chloroform/water. The organic layer was dried, evaporated, and purified by silica gel column chromatography ( $\text{AcOEt}/\text{CH}_2\text{Cl}_2 = 1/3$ ) to give 6-MeOBQET as white powder. Yield, 738 mg (1.69 mmol, 61%). Recrystallization from chloroform-acetonitrile afforded single crystals suitable for X-ray crystallography.

$^1\text{H}$  NMR ( $\text{CDCl}_3$ ):  $\delta$  8.07 (d, 2H,  $J = 9.0$  Hz), 7.78 (d, 2H,  $J = 9.2$  Hz), 7.43 (d, 2H,  $J = 9.0$  Hz), 7.30 (dd, 2H,  $J = 2.8, 9.2$  Hz), 7.21 (d, 2H,  $J = 2.8$  Hz), 3.91 (s, 4H), 3.89 (s, 6H), 2.66, (s, 4H).

$^{13}\text{C}$  NMR ( $\text{CDCl}_3$ ):  $\delta$  158.5, 157.7, 144.2, 131.0, 128.9, 122.7, 122.5, 106.5, 56.2, 38.6, 31.9.

Anal calcd for  $C_{24}H_{24}N_2O_2S_2$  (6-MeOBQET): H, 5.54; C, 66.03; N, 6.42. Found: H, 5.58; C, 66.06; N, 6.35.

### TriMeOBQET

To the acetonitrile suspension (50 mL) of 5,6,7-trimethoxy-2-chloromethylquinoline (535 mg, 2.00 mmol) and 1,2-ethanedithiol (80.0  $\mu$ L, 1.00 mmol) was added potassium carbonate (1.39 g, 10.0 mmol) and stirred for 2 days under reflux. After removal of the solvent, the residue was extracted with chloroform/water. The organic layer was dried, evaporated, and purified by silica gel column chromatography (AcOEt) to give TriMeOBQET as yellow oil. Yield, 253 mg (0.46 mmol, 46%).

$^1H$  NMR ( $CD_3OD$ ):  $\delta$  8.29 (d, 2H,  $J = 9.0$  Hz), 7.34 (d, 2H,  $J = 9.0$  Hz), 7.18 (s, 2H), 4.06 (s, 6H), 4.02 (s, 6H), 4.00 (s, 6H), 3.96 (s, 4H), 2.71, (s, 4H).

$^{13}C$  NMR ( $CD_3OD$ ):  $\delta$  157.9, 155.9, 146.7, 145.0, 140.4, 131.1, 118.6, 117.8, 103.7, 61.6, 61.2, 56.1, 38.5, 31.3.

Anal. calcd for  $C_{28}H_{33}N_2O_{6.5}S_2$  (TriMeOBQET  $0.5H_2O$ ): H, 5.88; C, 59.45; N, 4.95. Found: H, 5.80; C, 59.68; N, 5.11.

### [Hg(BQET)(ClO<sub>4</sub>)]ClO<sub>4</sub>

In an acetonitrile solution of BQET was added equimolar amount of  $Hg(ClO_4)_2 \cdot 6H_2O$  in ethanol, and the solution was kept at 4 °C under ether diffusion condition to give colorless crystals. Yield, 23%.

$^1H$  NMR ( $DMSO-d_6$ ):  $\delta$  8.64 (d, 2H,  $J = 8.4$  Hz), 8.42 (d, 2H,  $J = 8.4$  Hz), 8.17 (d, 2H,  $J =$

7.3 Hz), 7.94 (m, 2H), 7.82 (m, 2H), 7.73 (d, 2H,  $J = 8.5$  Hz), 4.63 (s, 4H), 3.03 (s, 4H).

$^{13}\text{C}$  NMR (DMSO- $d_6$ ):  $\delta$  154.6, 145.0, 139.8, 131.5, 128.8, 128.2, 127.9, 127.4, 123.5, 36.8, 31.1.

Anal. calcd for  $\text{C}_{22}\text{H}_{20}\text{Cl}_2\text{HgN}_2\text{O}_8\text{S}_2$  ( $[\text{Hg}(\text{BQET})(\text{ClO}_4)_2]$ ): H, 2.60; C, 34.05; N, 3.61.

Found: H, 2.78; C, 34.25; N, 3.82.

### X-ray crystallography

Single crystals of 6-MeOBQET and  $[\text{Hg}(\text{BQET})(\text{ClO}_4)]\text{ClO}_4$  were covered by Paratone-N oil and mounted on a glass fiber. All data were collected at 123 K on a Rigaku Mercury CCD detector, with monochromatic  $\text{MoK}\alpha$  radiation, operating at 50 kV/40 mA. Data were processed on a PC using CrystalClear Software (Rigaku). Structures were solved by direct methods (SIR-92)<sup>2</sup> and refined by full-matrix least-squares methods on  $F^2$  (SHELXL-97).<sup>3</sup> Crystal data are summarized in Tables S1. CCDC-924739 and 924740 contain the supplementary crystallographic data for this paper. These data can be obtained free of charge from The Cambridge Crystallographic Data Centre via [www.ccdc.cam.ac.uk/datarequest/cif](http://www.ccdc.cam.ac.uk/datarequest/cif).

### References

- 1 V. Amendola, C. Mangano, P. Pallavicini and M. Zema, *Inorg. Chem.*, 2003, **42**, 6056.
- 2 A. Altomare, G. Cascarano, C. Giacovazzo, A. Guagliardi, M. C. Burla, G. Polidori and M. Camalli, *J. Appl. Cryst.*, 1994, **27**, 435.

- 3 G. M. Sheldrick, *SHELXL-97, Program for refinement of crystal structures, University of Göttingen, Germany, 1997.*

**Table S1.** Crystallographic Data for 6-MeOBQET and [Hg(BQET)(ClO<sub>4</sub>)]ClO<sub>4</sub>

|                                                                     | 6-MeOBQET                                                                    | [Hg(BQET)(ClO <sub>4</sub> )]ClO <sub>4</sub>                                                  |
|---------------------------------------------------------------------|------------------------------------------------------------------------------|------------------------------------------------------------------------------------------------|
| Formula                                                             | C <sub>24</sub> H <sub>24</sub> N <sub>2</sub> O <sub>2</sub> S <sub>2</sub> | C <sub>22</sub> H <sub>20</sub> Cl <sub>2</sub> HgN <sub>2</sub> O <sub>8</sub> S <sub>2</sub> |
| FW                                                                  | 436.59                                                                       | 776.02                                                                                         |
| Crystal system                                                      | monoclinic                                                                   | triclinic                                                                                      |
| Space group                                                         | C2/c                                                                         | P-1                                                                                            |
| <i>a</i> , Å                                                        | 45.859(4)                                                                    | 14.2333(7)                                                                                     |
| <i>b</i> , Å                                                        | 6.0059(4)                                                                    | 14.4741(7)                                                                                     |
| <i>c</i> , Å                                                        | 15.7820(10)                                                                  | 15.0775(9)                                                                                     |
| $\alpha$ , deg                                                      | 90                                                                           | 101.0406(15)                                                                                   |
| $\beta$ , deg                                                       | 105.080(4)                                                                   | 113.0721(8)                                                                                    |
| $\gamma$ , deg                                                      | 90                                                                           | 111.1031(3)                                                                                    |
| <i>V</i> , Å <sup>3</sup>                                           | 4197.1(5)                                                                    | 2457.8(2)                                                                                      |
| <i>Z</i>                                                            | 8                                                                            | 4                                                                                              |
| <i>D</i> <sub>calc</sub> , g cm <sup>-3</sup>                       | 1.382                                                                        | 2.097                                                                                          |
| $\mu$ , mm <sup>-1</sup>                                            | 0.2780                                                                       | 6.7189                                                                                         |
| 2 $\theta$ <sub>max</sub> , deg                                     | 55                                                                           | 55                                                                                             |
| temp, K                                                             | 123                                                                          | 123                                                                                            |
| no. reflns collected                                                | 19768                                                                        | 24541                                                                                          |
| no. reflns used                                                     | 4804                                                                         | 11047                                                                                          |
| no. of params                                                       | 367                                                                          | 668                                                                                            |
| <i>R</i> <sub>int</sub>                                             | 0.0259                                                                       | 0.028                                                                                          |
| Final <i>R</i> 1 ( <i>I</i> > 2 $\sigma$ ( <i>I</i> )) <sup>a</sup> | 0.0424                                                                       | 0.0364                                                                                         |
| <i>wR</i> 2 (all data) <sup>b</sup>                                 | 0.1105                                                                       | 0.0856                                                                                         |
| GOF                                                                 | 1.086                                                                        | 1.097                                                                                          |

<sup>a</sup>*R*1 =  $\Sigma||F_o| - |F_c||/\Sigma|F_o|$ . <sup>b</sup>*wR*2 =  $[\Sigma w[(F_o^2 - F_c^2)^2]/\Sigma[w(F_o^2)^2]]^{1/2}$ .



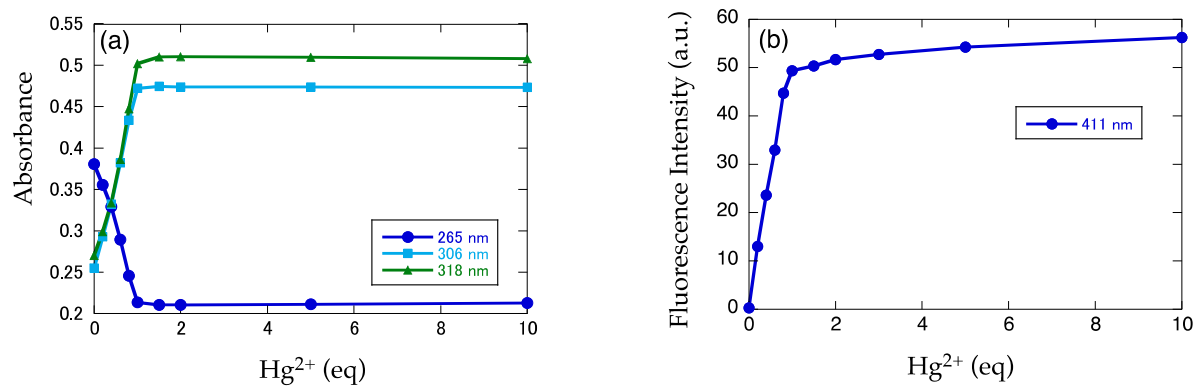

**Fig. S1** Hg<sup>2+</sup> titration profile for 34 μM BQET in CH<sub>3</sub>CN at 25 °C. (a) UV-vis absorbance changes at 265, 306 and 318 nm. (b) Fluorescence intensity changes ( $\lambda_{\text{ex}}$  = 317 nm) at 411 nm.



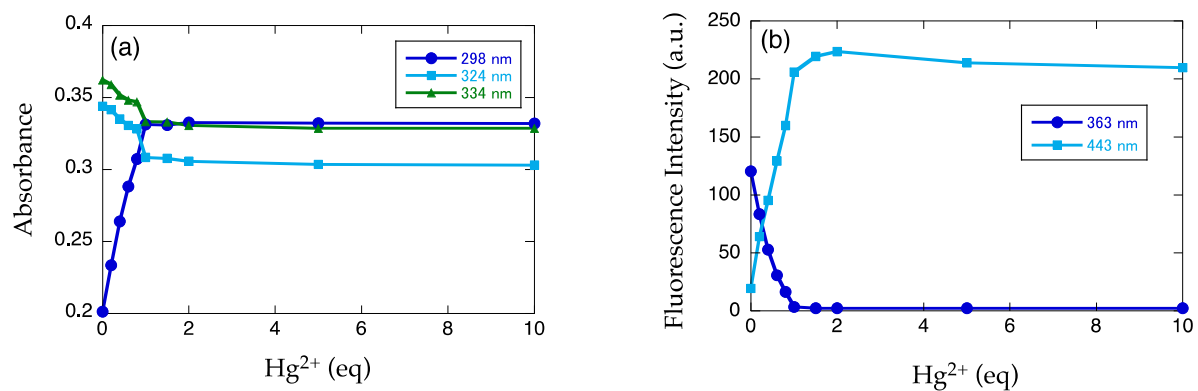

**Fig. S2** Hg<sup>2+</sup> titration profile for 34 μM 6-MeOBQET in CH<sub>3</sub>CN at 25 °C. (a) UV-vis absorbance changes at 298, 324 and 334 nm. (b) Fluorescence intensity changes ( $\lambda_{\text{ex}} = 334$  nm) at 363 and 443 nm.

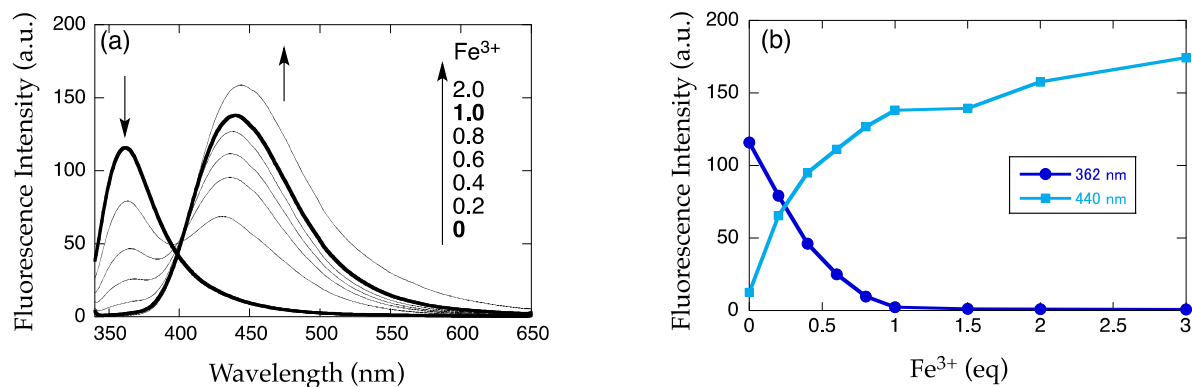

**Fig. S3** (a) Fluorescence ( $\lambda_{\text{ex}} = 334 \text{ nm}$ ) spectra of  $34 \mu\text{M}$  6-MeOBQET in acetonitrile at  $25 \text{ }^\circ\text{C}$  in the presence of various concentration of  $\text{Fe}^{3+}$  ranging from 0 to  $68 \mu\text{M}$ . (b) Fluorescence intensity changes at 363 and 443 nm.

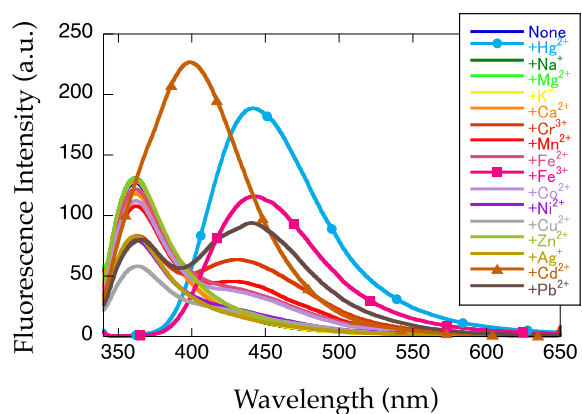

**Fig. S4** Comparison of fluorescence spectra of 34 μM 6-MeOBQET ( $\lambda_{\text{ex}} = 334$  nm) in CH<sub>3</sub>CN at 25 °C in the presence of 1 equivalent of Hg<sup>2+</sup> (light blue, circles), Fe<sup>3+</sup> (red magenta, squares) cadmium (light brown, triangles) and other metal ions (various colors, no marks).

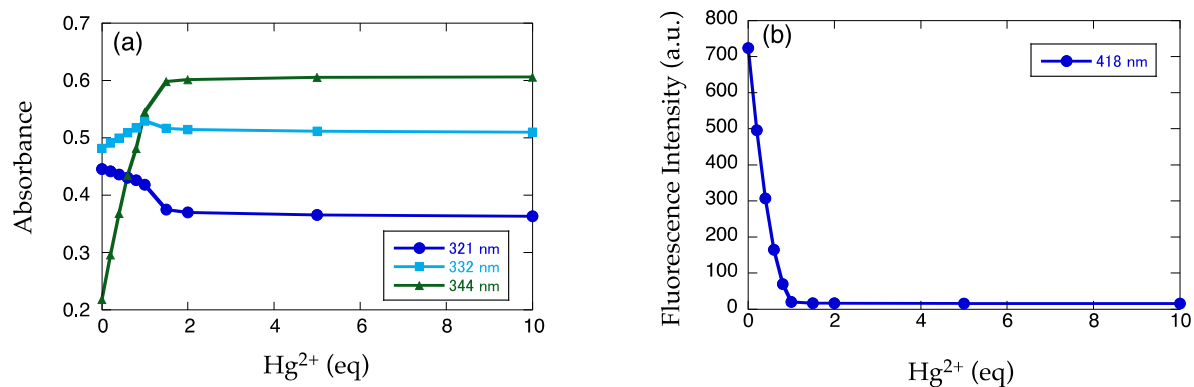

**Fig. S5** Hg<sup>2+</sup> titration profile for 34 μM TriMeOBQET in CH<sub>3</sub>CN at 25 °C. (a) UV-vis absorbance changes at 321, 332 and 344 nm. (b) Fluorescence intensity changes ( $\lambda_{\text{ex}} = 334 \text{ nm}$ ) at 418 nm.

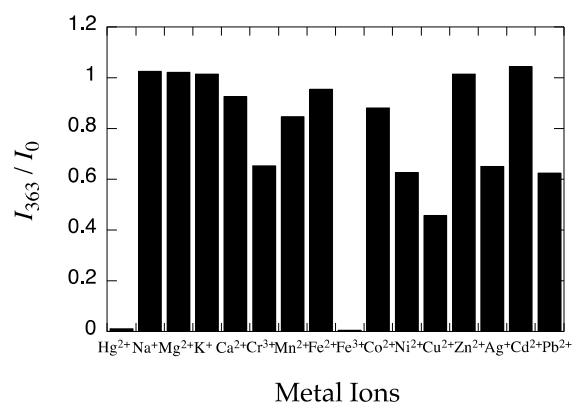

**Fig. S6** The relative fluorescence intensity of 6-MeOBQET at 363 nm in the presence of 1 equivalent of metal ions in acetonitrile at 25 °C.  $I_0$  is the emission intensity of free ligand.

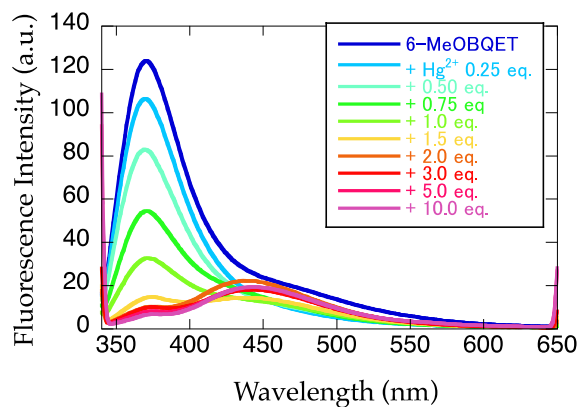

**Fig. S7** Fluorescence ( $\lambda_{\text{ex}} = 334 \text{ nm}$ ) spectra of  $34 \mu\text{M}$  6-MeOBQET in acetonitrile/water (1/1) at  $25 \text{ }^\circ\text{C}$  in the presence of various concentration of  $\text{Hg}^{2+}$  ranging from 0 to  $340 \mu\text{M}$ .

S15

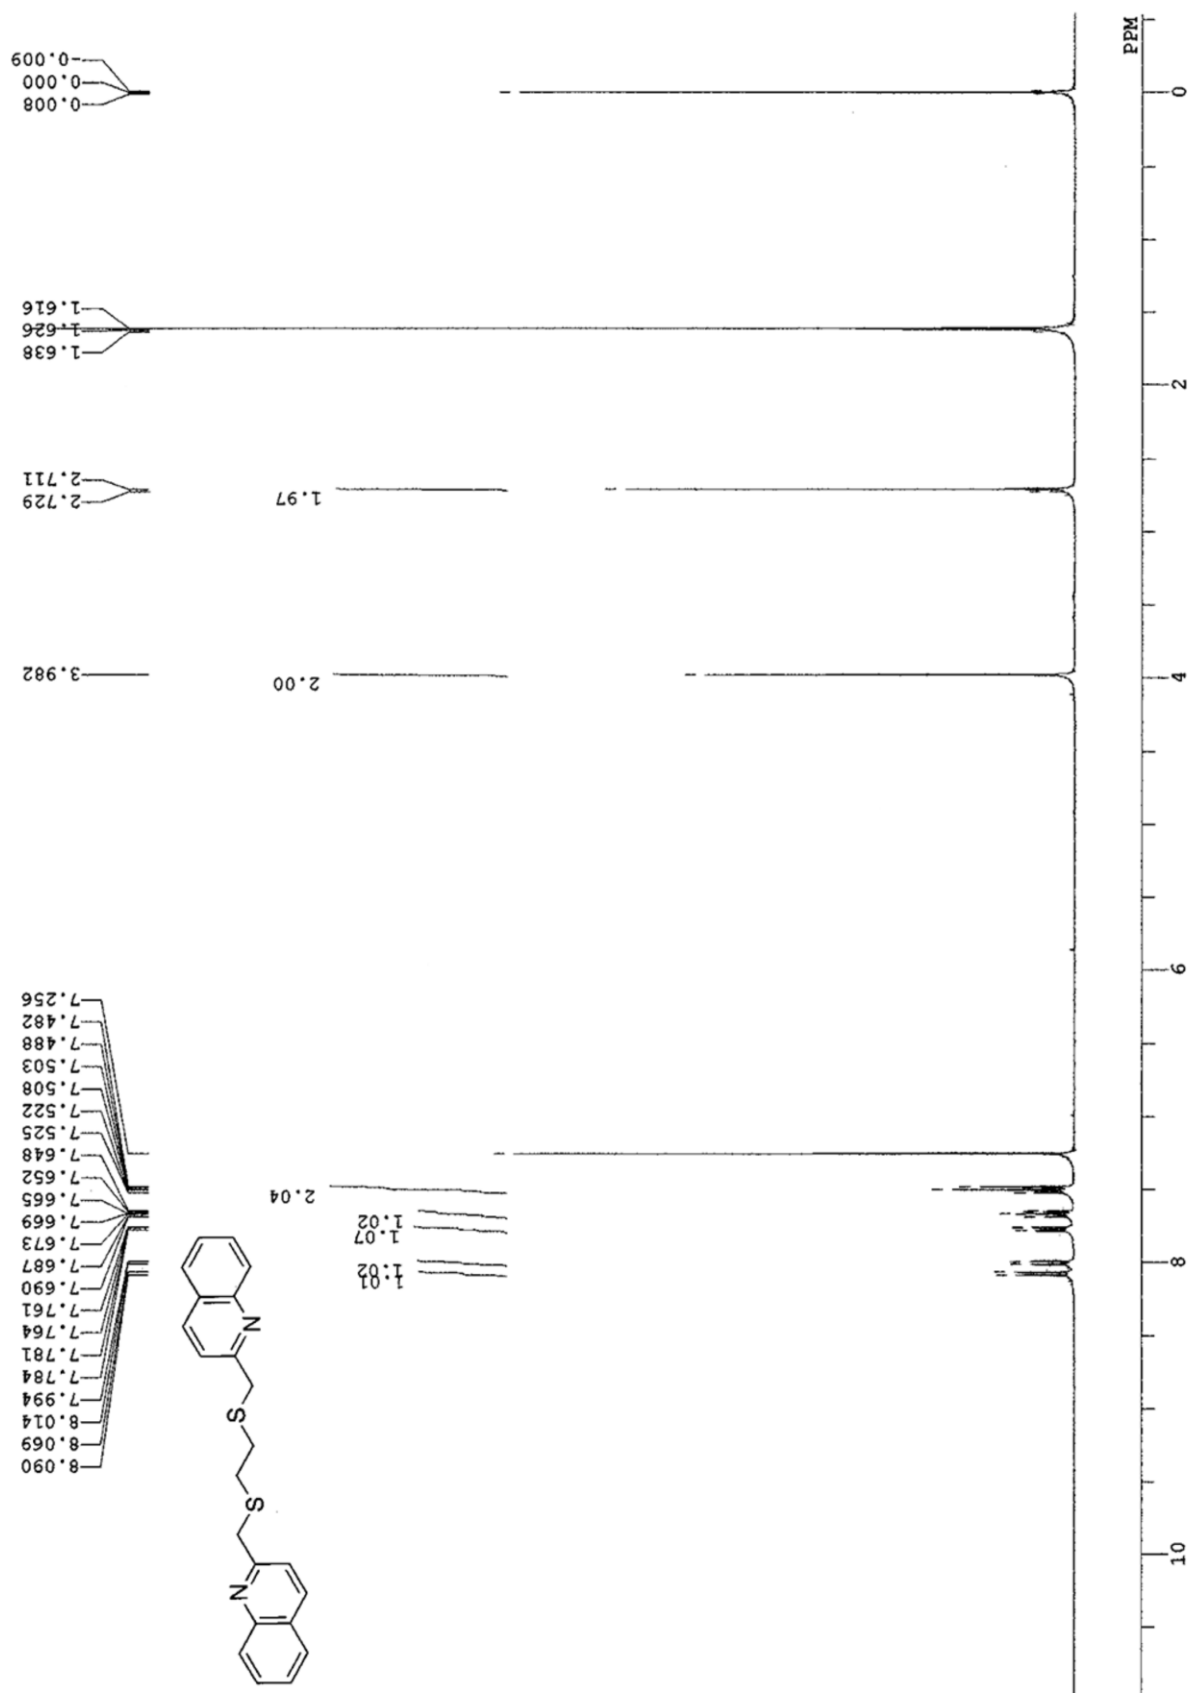

Fig. S8 <sup>1</sup>H NMR spectrum of BQET in CDCl<sub>3</sub>.

S16

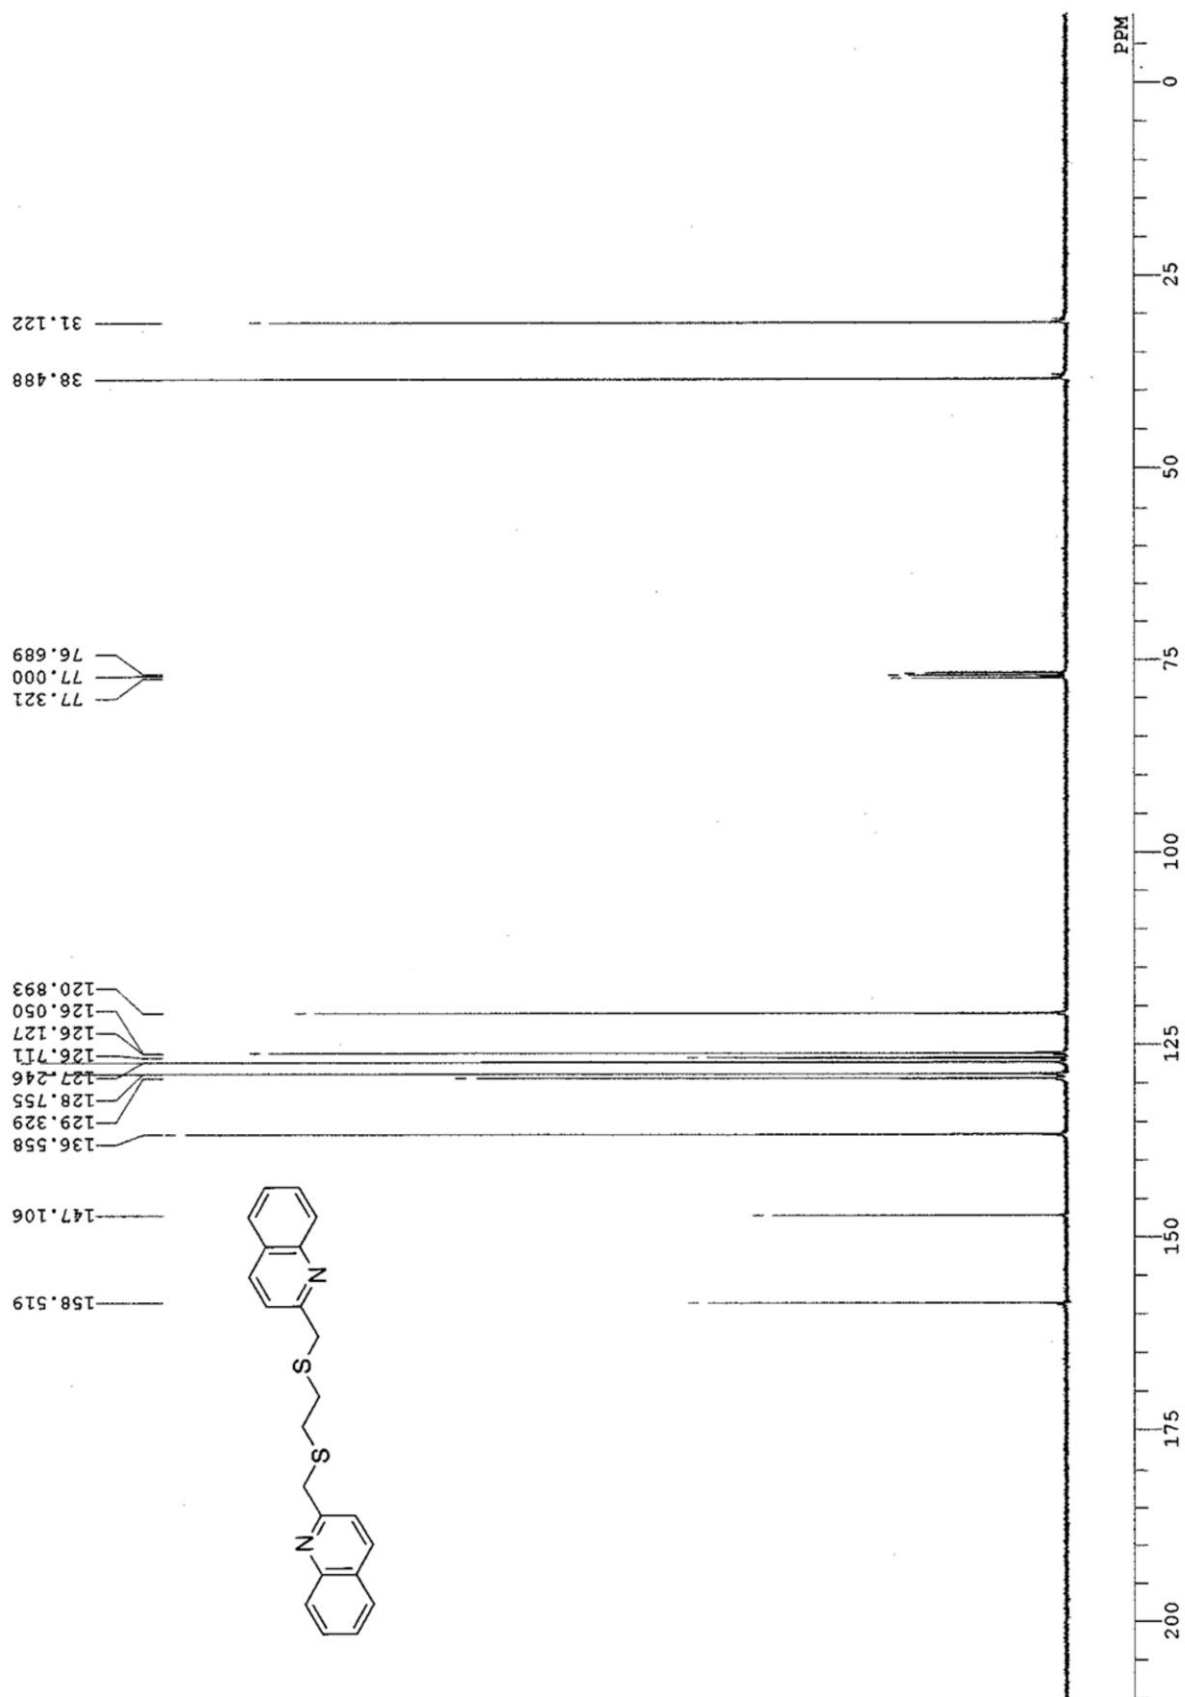

Fig. S9  $^{13}\text{C}$  NMR spectrum of BQET in  $\text{CDCl}_3$ .



S17

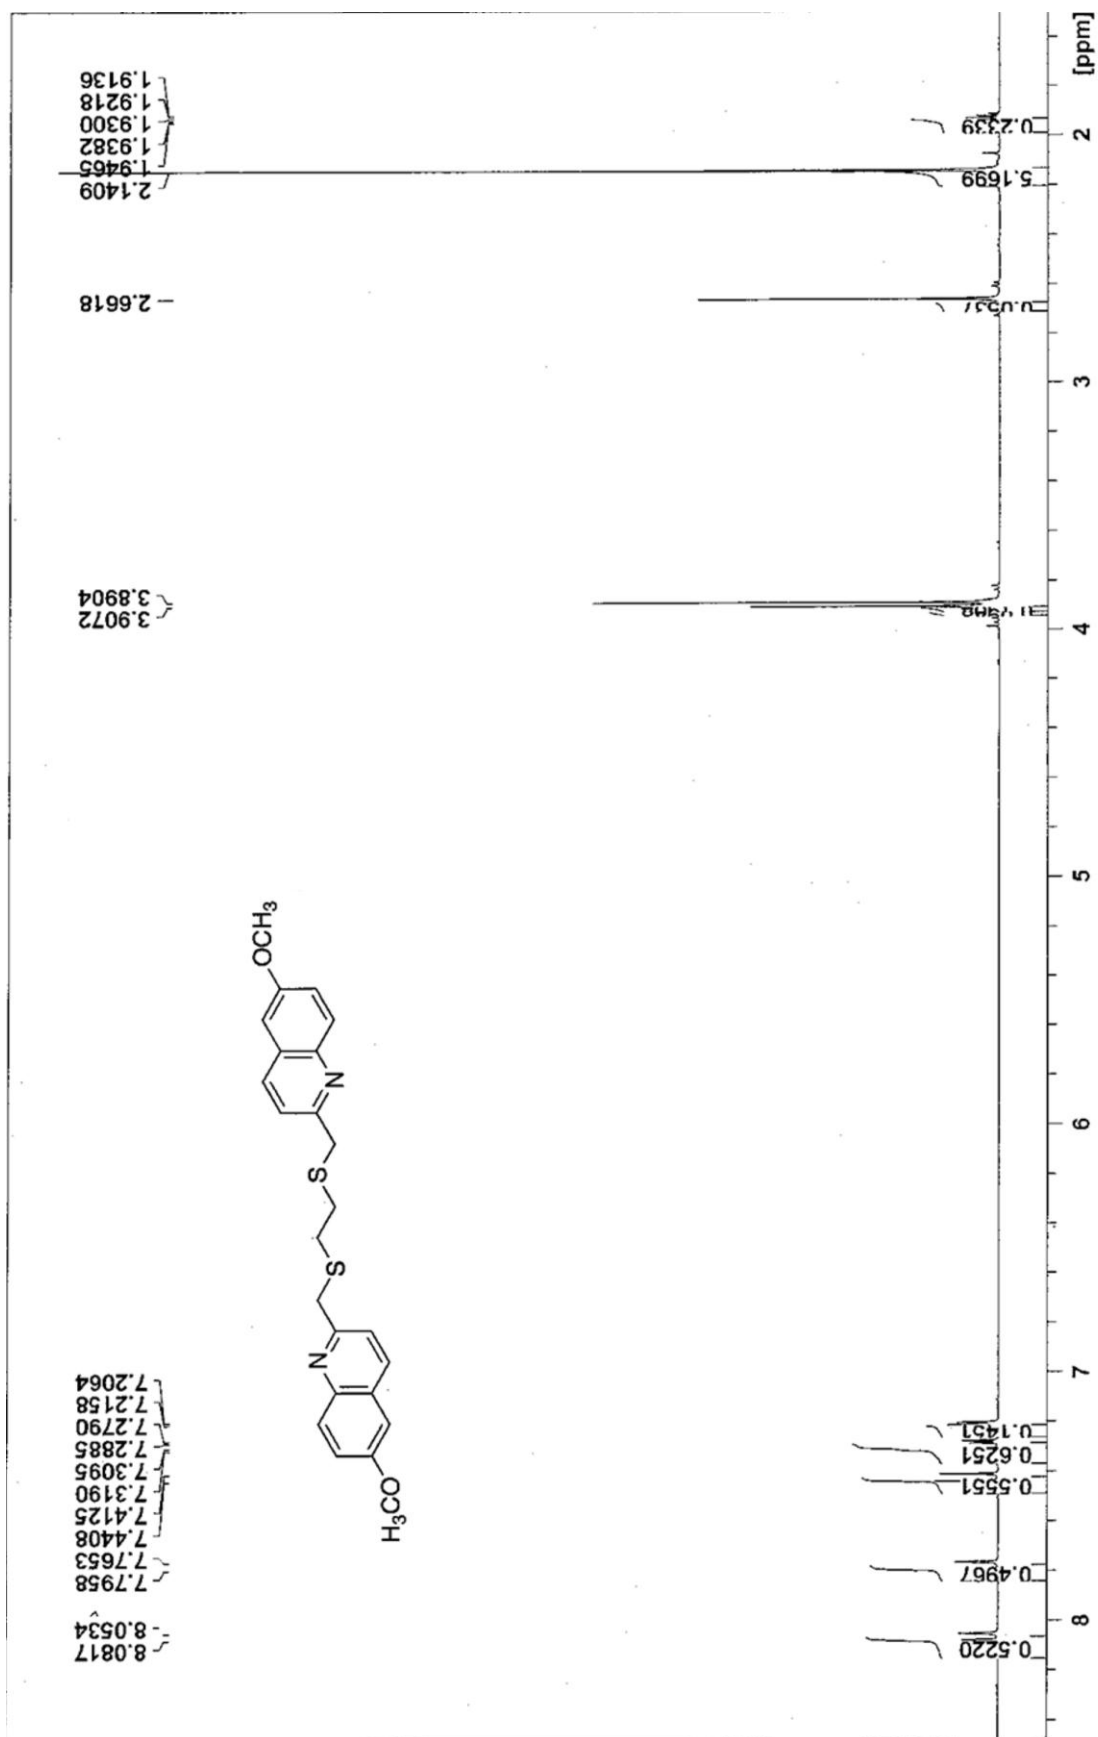

Fig. S10  $^1\text{H}$  NMR spectrum of 6-MeOBQET in CD<sub>3</sub>CN.

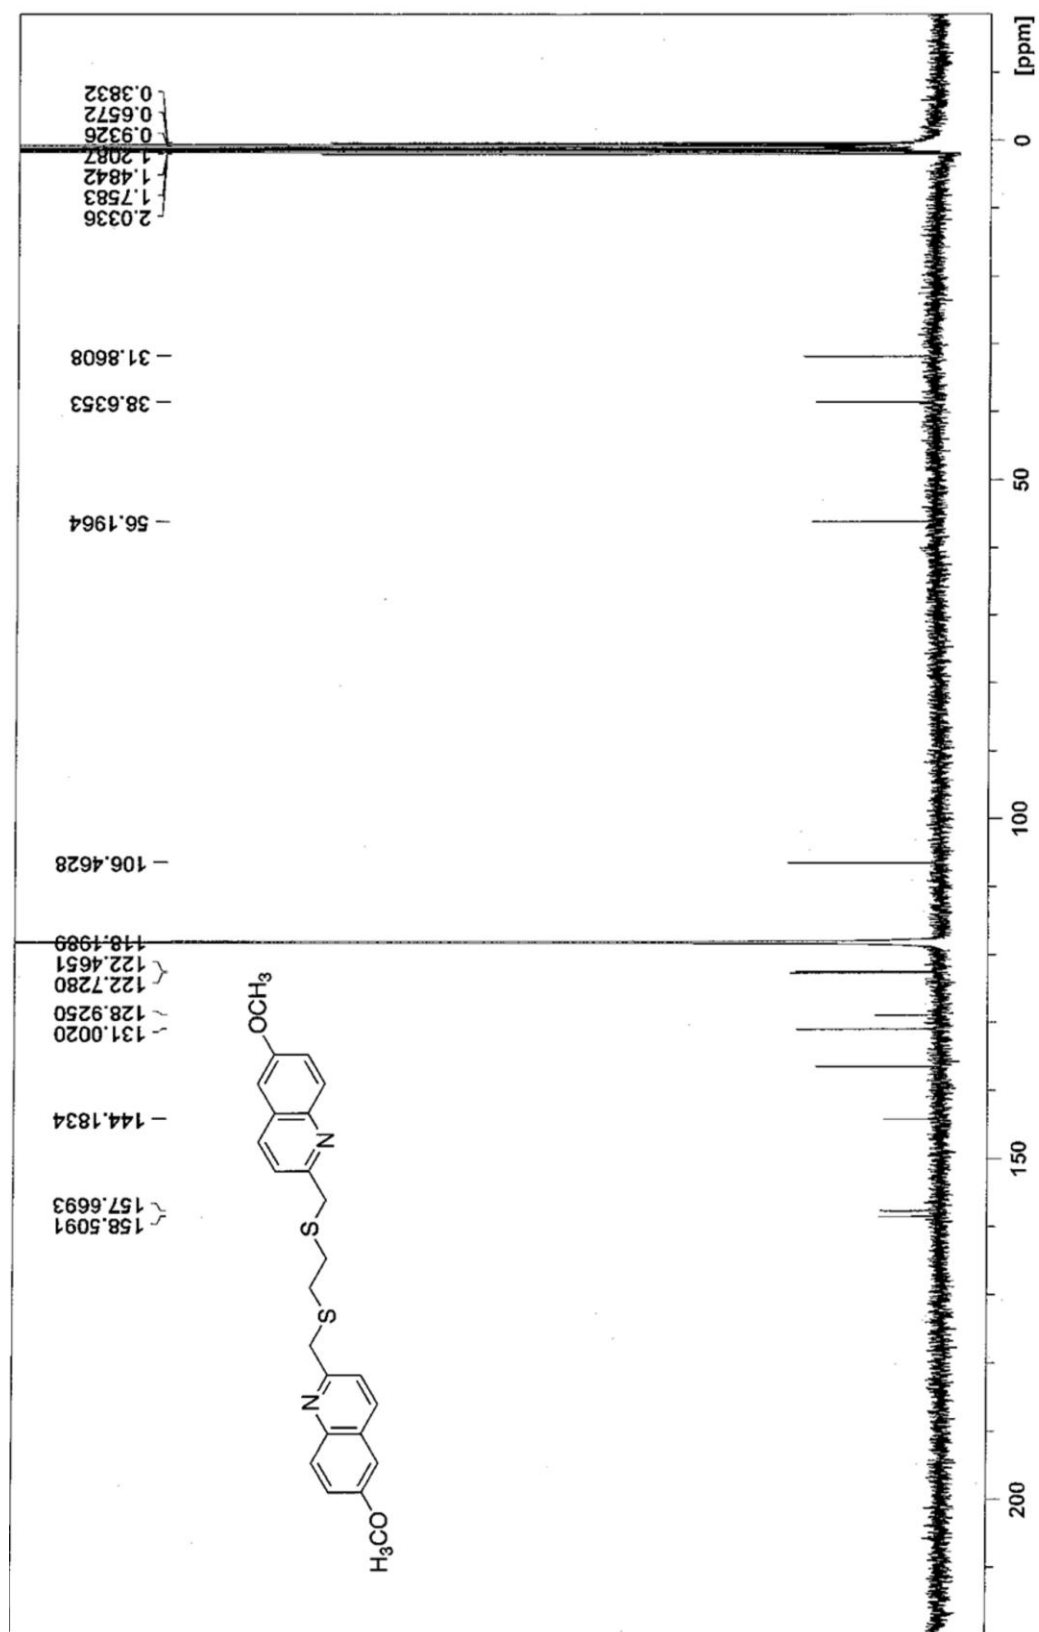

Fig. S11  $^{13}\text{C}$  NMR spectrum of 6-MeOBQET in  $\text{CD}_3\text{CN}$ .

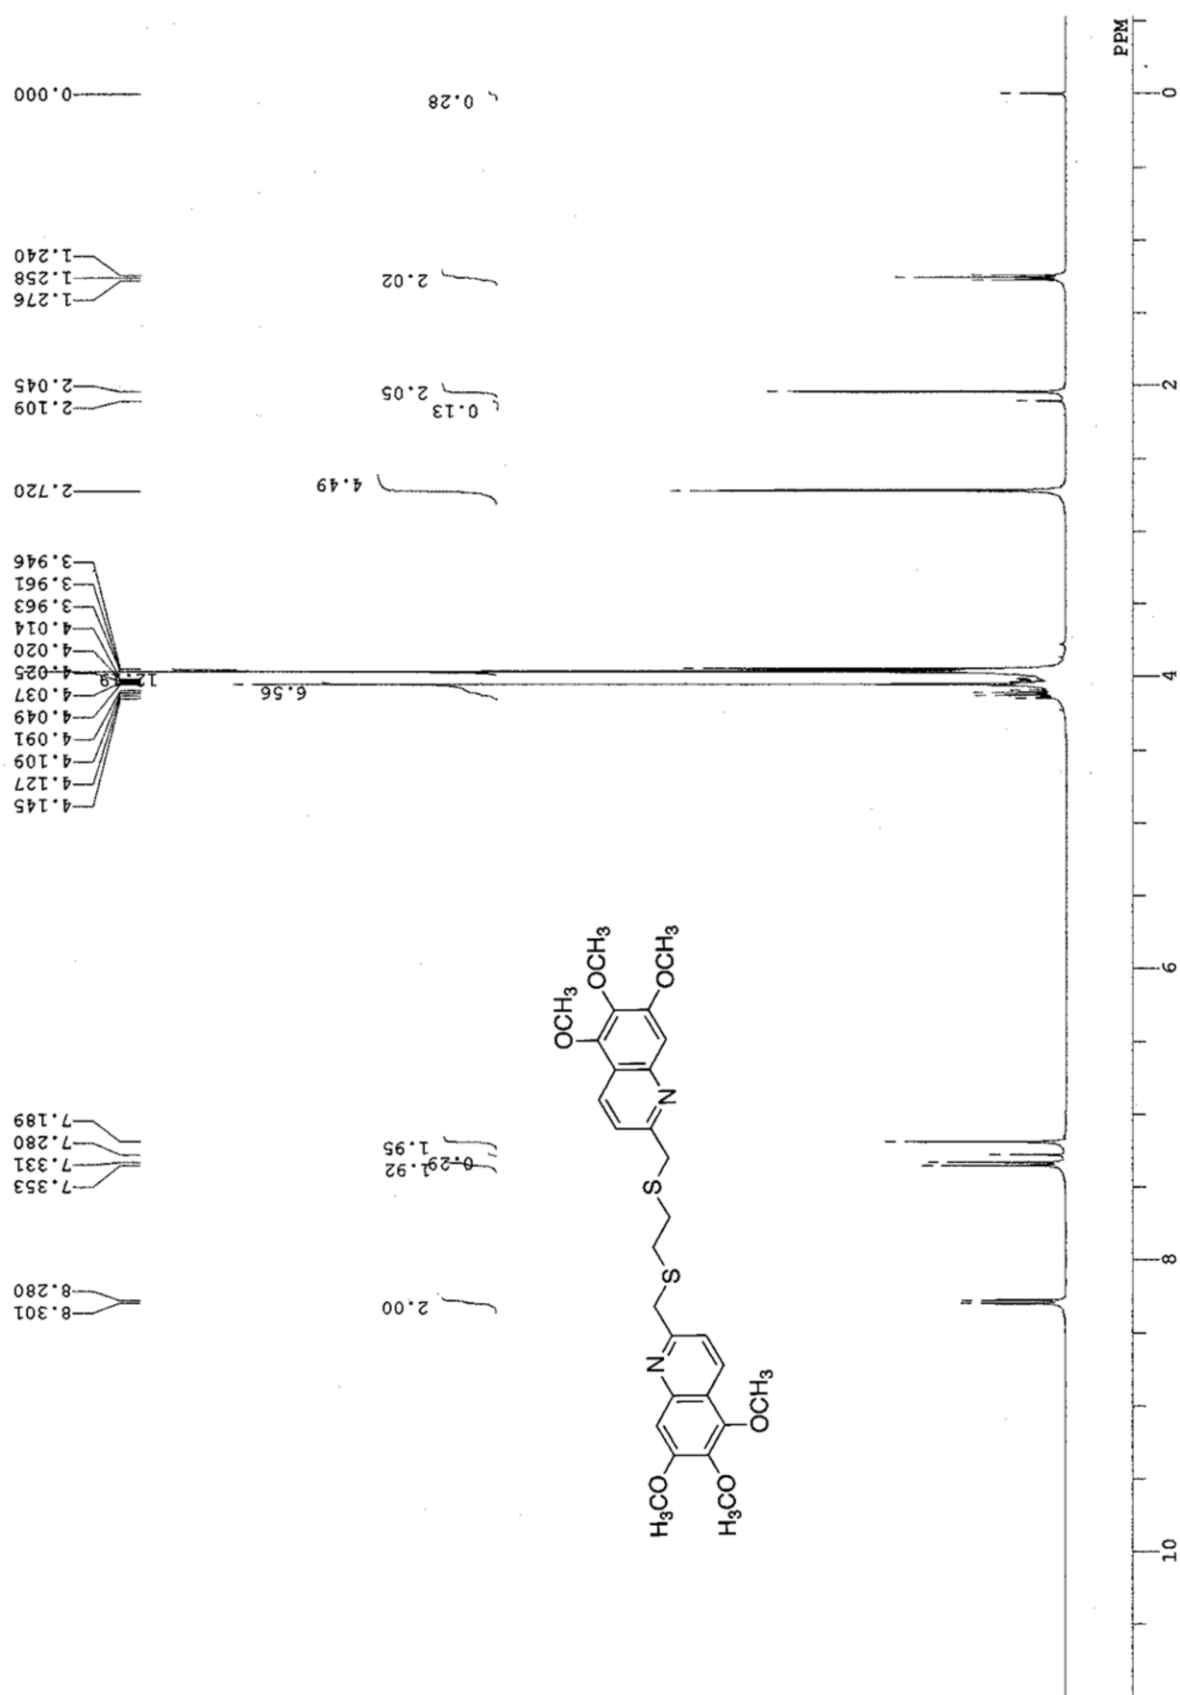

Fig. S12 <sup>1</sup>H NMR spectrum of TriMeOBQET in CDCl<sub>3</sub>.

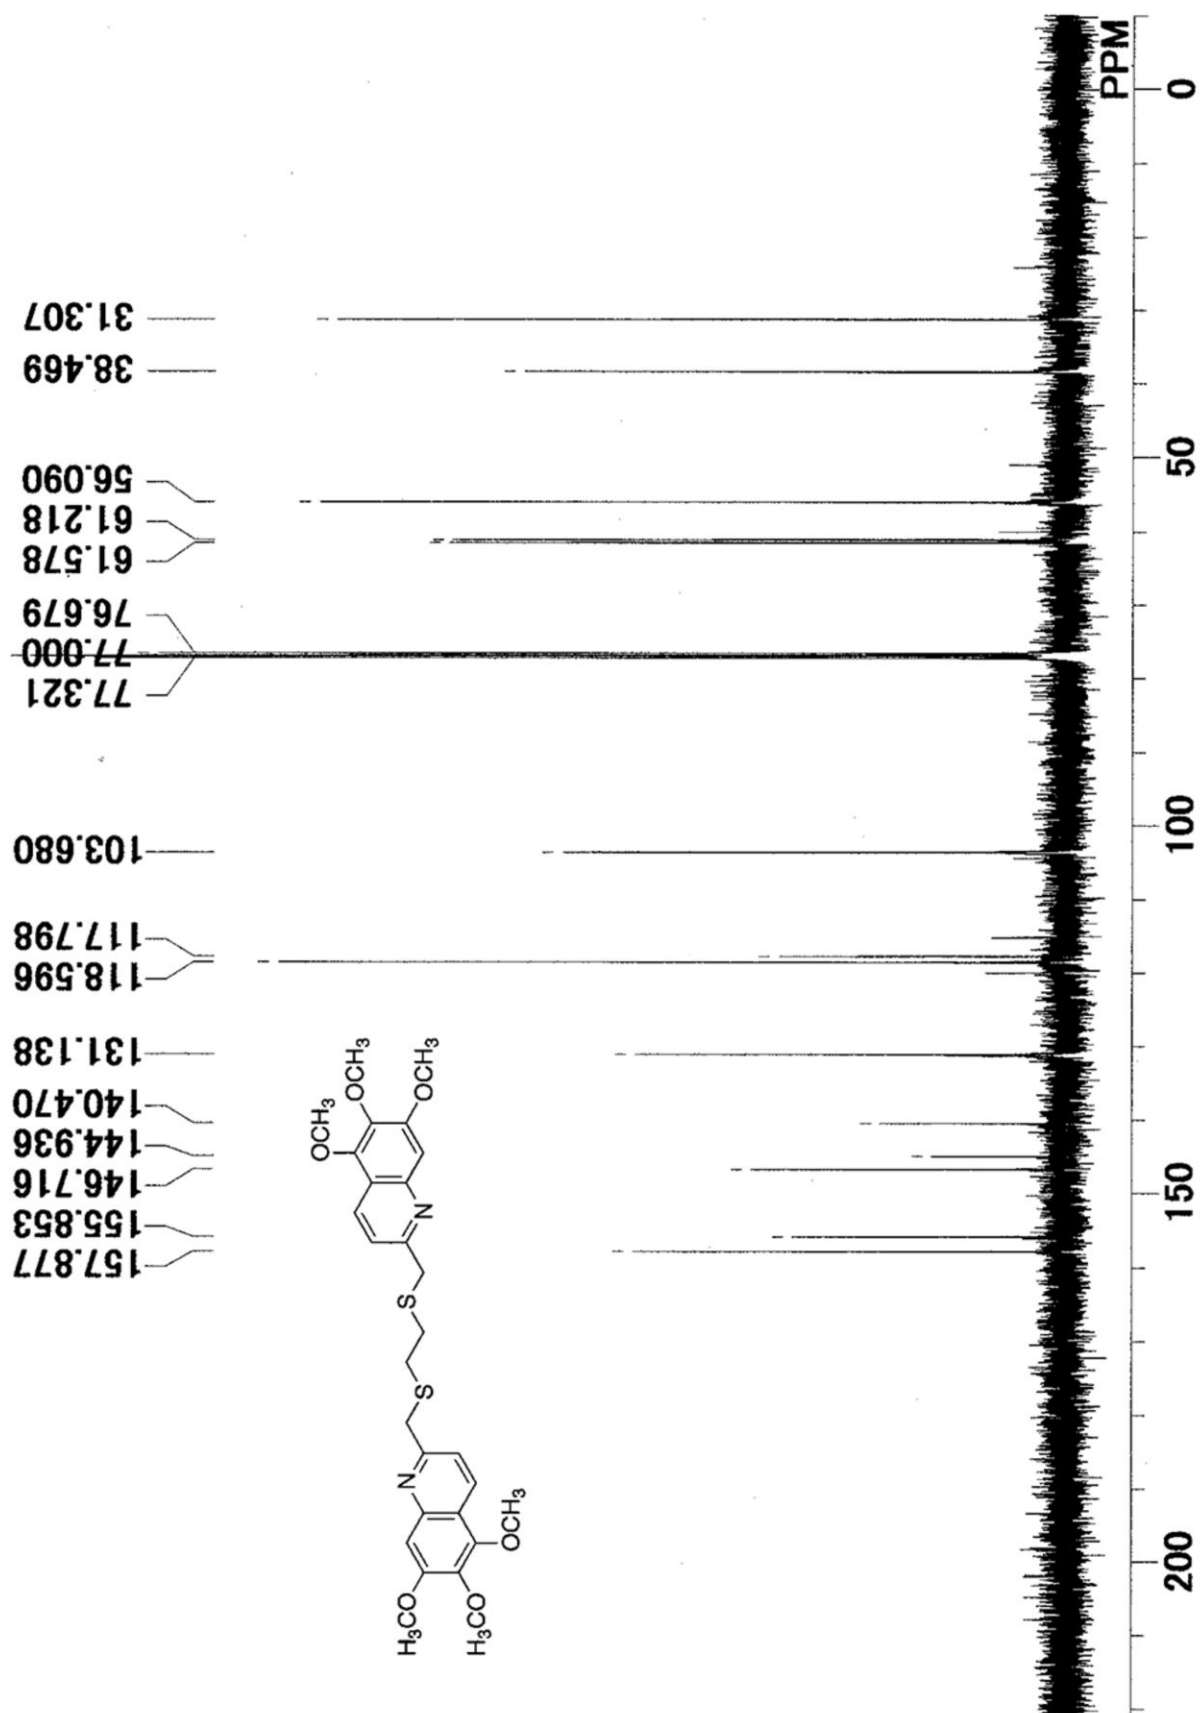

Fig. S13  $^{13}\text{C}$  NMR spectrum of TriMeOBQET in  $\text{CDCl}_3$ .

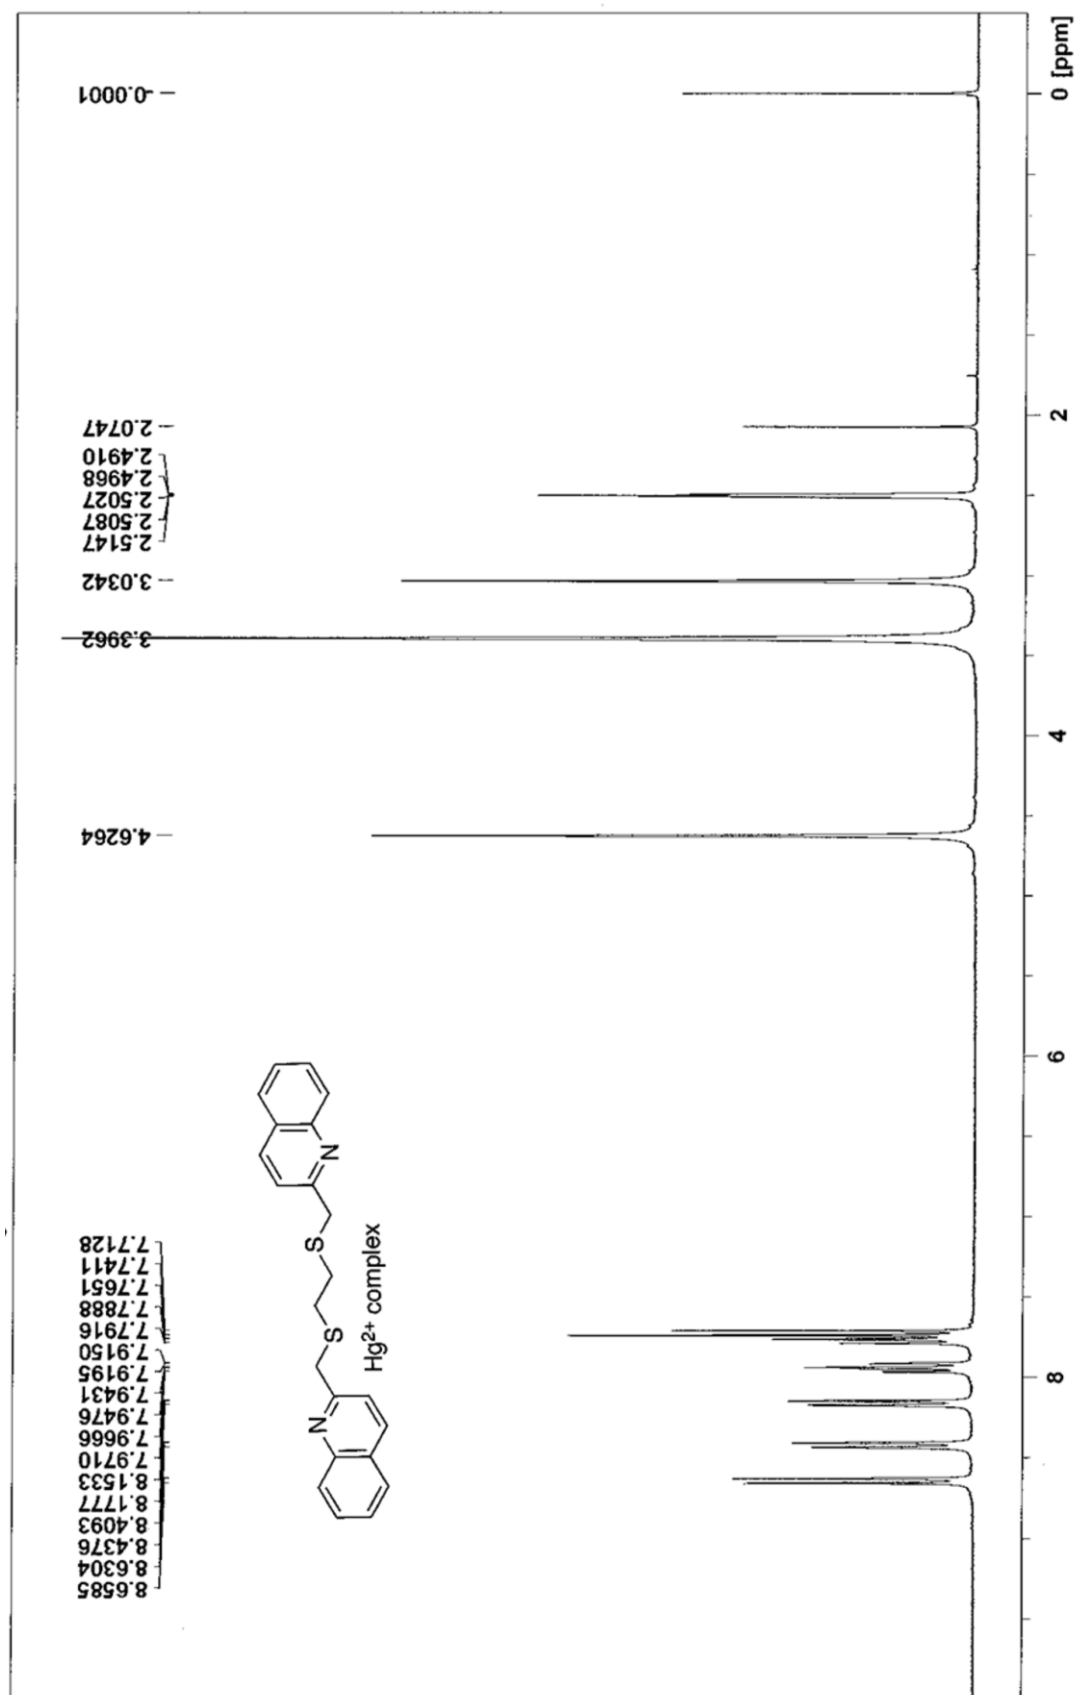

Fig. S14  $^1\text{H}$  NMR spectrum of  $[\text{Hg}(\text{BQET})(\text{ClO}_4)]\text{ClO}_4$  in  $\text{DMSO-}d_6$ .

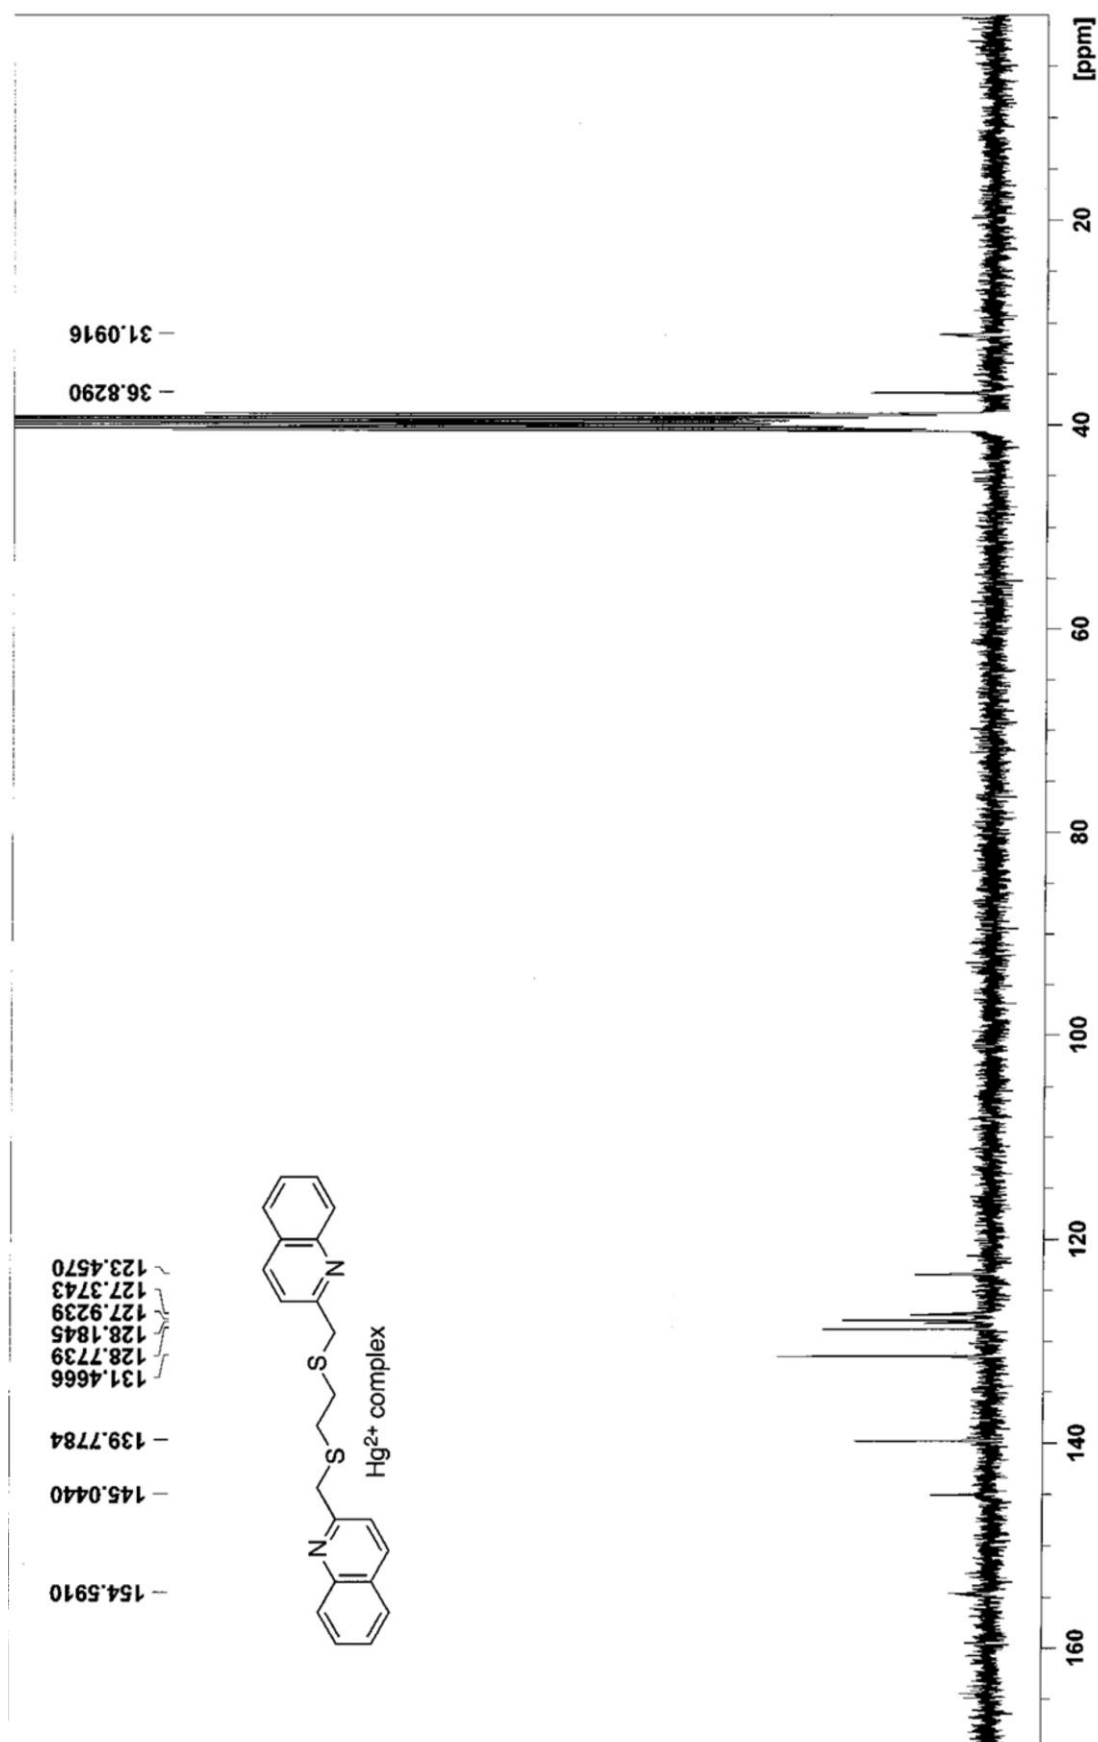

**Fig. S15**  $^{13}\text{C}$  NMR spectrum of  $[\text{Hg}(\text{BQET})(\text{ClO}_4)]\text{ClO}_4$  in  $\text{DMSO-}d_6$ .
